# Supplementary material for: Improvement of sensory neuron growth and survival via negatively regulating PTEN by miR-21-5p-contained small extracellular vesicles from skin precursor-derived Schwann cells
Source: PubMed Central journal article supplement (PMC7831194; doi:10.1186/s13287-020-02125-4), 2021-01-25
Supplement: 13287_2020_2125_MOESM4_ESM.pdf [file 13287_2020_2125_MOESM4_ESM.pdf]

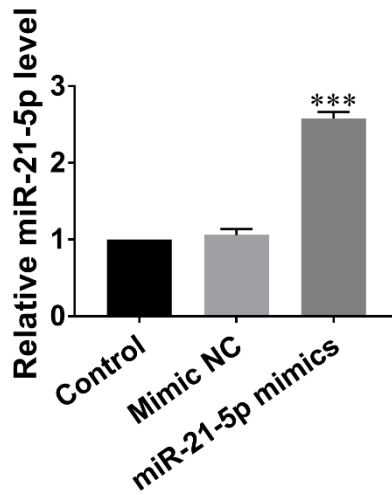

**Fig. S2** Transfection efficiency of miR-21-5p into sensory neurons. The histogram showing that the relative miR-21-5p expression in mimics transfection group is significantly higher than that in the control group and the mimic NC group.  $n = 3$ ; \*\*\*  $p < 0.001$  compared with control group.
